# Supplementary material for: A Comprehensive Search of Non-Canonical Proteins in Non-Small Cell Lung Cancer and Their Impact on the Immune Response
Source: MDPI journal article supplement (doi:10.3390/ijms23168933), 2022-08-11
Supplement: s1 [file s1]

## **Mass spectrometry analysis of Ig-bound protein complexes**

Mass spectrometry-based (MS) analysis of circulating Ig-bound protein complexes was performed as previously described.<sup>23,25</sup> Briefly, Ig-bound proteins from a total of 100  $\mu$ L of plasma were extracted using NAb protein A/G spin columns (Thermo Fisher Scientific) according to the manufacturer's instructions. Columns were equilibrated twice with 400  $\mu$ L binding buffer (phosphate buffered saline; PBS, pH 7.2) and then incubated for 10 min at room temperature (RT) with plasma samples diluted 1:2 in PBS, pH 7.2. Columns were washed three times with 400  $\mu$ L of PBS, pH 7.2. Ig-bound proteins were eluted twice with 400  $\mu$ L of 0.1 M glycine, pH 3. The flow-through was collected and then neutralized with 40  $\mu$ L of PBS, pH 9. After each step, columns were centrifuged for 1 min at 5000 x g. To reduce non-specific binding to the protein A/G spin columns, an additional low pH wash with 400  $\mu$ L of PBS, pH 5, was performed before Ig-bound protein elution. For MS analysis, the collected proteins were treated with 25 mM tris(2-carboxyethyl)phosphine for Cys reduction and subsequently alkylated with acrylamide. The samples were next fractionated at the protein level by reverse-phase chromatography followed by desalting for 5 min with 95% mobile phase A (0.1% trifluoroacetic acid (TFA) in 95% water). Proteins were eluted from the column and collected into 12 fractions, with a gradient elution that included an increase from 5% to 70% mobile phase B (0.1% TFA in 95% acetonitrile) over 25 min, 70% to 95% mobile phase B for 3 min, a wash step to hold at 95% mobile phase B for 2 min, followed by a re-equilibration step at 95% mobile phase A for 5 min. For Ig-bound protein analysis, protein digestion and identification by liquid chromatography coupled tandem mass spectrometry (LC-MS/MS), a nanoAcquity ultra performance LC system coupled in-line

with WATERS SYNAPT G2-Si mass spectrometer was used for the separation of pooled digested protein fractions. The system was equipped with a Waters Symmetry C18 nanoAcquity trap-column (180 mm 20 mm, 5 mm) and a Waters HSS-T3 C18 nanoAcquity analytical column (75 mm, 150 mm, 1.8 mm). Data were acquired in resolution mode with SYNAPT G2-Si using Waters Masslynx (version 4.1, SCN 851). The mass spectrometer was operated in V-mode with a typical resolving power of at least 20,000. All analyses were performed using positive mode electrospray ionization using a NanoLockSpray source. The lock mass channel was sampled every minute. Accurate mass LC-HDMSE data were collected in an alternating, low energy (MS) and high energy (MSE) mode of acquisition with mass scan range from  $m/z$  50 to 1800. The spectral acquisition time in each mode was 1.0 s with a 0.1 s inter-scan delay.

**Supplemental Table S1. Cell Lines evaluated and number of identified cryptoproteins.**

| <b>Cell Line</b> | <b># of cryptoproteins quantified</b> | <b>Known driver mutation</b>   |
|------------------|---------------------------------------|--------------------------------|
| H2228            | 130                                   | <i>EML4ALK</i>                 |
| H1395            | 143                                   | <i>LKB1</i>                    |
| H2405            | 126                                   | <i>TP53</i>                    |
| H522             | 137                                   | <i>TP53</i>                    |
| H969             | 106                                   | <i>WT</i>                      |
| H1703            | 123                                   | <i>TP53</i>                    |
| H1650            | 122                                   | <i>WT</i>                      |
| HCC827           | 147                                   | <i>TP53, EGFR</i>              |
| HCC4006          | 104                                   | <i>TP53, EGFR</i>              |
| H820             | 122                                   | <i>TP53, EGFR</i>              |
| HCC2935          | 127                                   | <i>TP53, EGFR</i>              |
| H2009            | 48                                    | <i>TP53, KRAS</i>              |
| H650             | 27                                    | <i>TP53, EGFR</i>              |
| H1795            | 131                                   | <i>TP53, KRAS, KEAP1</i>       |
| H2122            | 143                                   | <i>TP53, KRAS, KEAP1, LKB1</i> |
| H647             | 95                                    | <i>TP53, KRAS, KEAP1, LKB1</i> |
| HCC4017          | 99                                    | <i>TP53, KRAS</i>              |

**Supplemental Table S2. Patient and tumor characteristics for newly-diagnosed NSCLC cohort.**

| Sampling | Subtype        | Smoking Status | Smoking pack years (PYs) | Sex    | Age | Stage |
|----------|----------------|----------------|--------------------------|--------|-----|-------|
| Pool #1  | Adenocarcinoma | Current        | 75                       | Female | 65  | IA    |
|          | Adenocarcinoma | Former         | 40                       | Female | 56  | IA    |
|          | Adenocarcinoma | Current        | 6                        | Female | 48  | IA    |
| Pool #2  | Adenocarcinoma | Current        | 116                      | Female | 75  | IA    |
|          | Adenocarcinoma | Current        | 30                       | Female | 48  | IA    |
|          | Adenocarcinoma | Former         | 20                       | Female | 68  | IA    |
| Pool #3  | Squamous       | Former         | 38                       | Male   | 62  | IA    |
|          | Squamous       | Former         | 75                       | Female | 70  | IB    |
|          | Squamous       | Former         | 20                       | Female | 76  | IB    |
| Pool #4  | Squamous       | Former         | 40                       | Male   | 73  | IA    |
|          | Squamous       | Former         | 60                       | Female | 73  | IB    |
|          | Squamous       | Former         | 40                       | Female | 64  | IB    |
| Pool #5  | Adenocarcinoma | Former         | 120                      | Male   | 79  | IA    |
|          | Adenocarcinoma | Former         | >100                     | Female | 72  | IA    |
|          | Adenocarcinoma | Current        | 40                       | Male   | 56  | IA    |
| Pool #6  | Adenocarcinoma | Former         | 30                       | Male   | 59  | IIA   |
|          | Adenocarcinoma | Former         | 30                       | Female | 64  | IIA   |
|          | Adenocarcinoma | Current        | -                        | Male   | 59  | IIB   |
| Pool #7  | Adenocarcinoma | Former         | 88                       | Male   | 61  | IIB   |
|          | Adenocarcinoma | Current        | 46                       | Female | 62  | IIA   |
|          | Adenocarcinoma | Current        | >100                     | Male   | 71  | IIA   |
| Pool #8  | Squamous       | Current        | 30                       | Female | 68  | IIA   |
|          | Squamous       | Former         | 40                       | Male   | 68  | IIB   |
|          | Squamous       | Former         | 75                       | Male   | 79  | IIB   |
| Pool #9  | Squamous       | Current        | 100                      | Male   | 60  | IIA   |
|          | Squamous       | Former         | -                        | Male   | 74  | IIB   |
|          | Squamous       | Current        | 80                       | Male   | 63  | IIA   |
| Pool #10 | Adenocarcinoma | Former         | 120                      | Male   | 79  | IA    |
|          | Adenocarcinoma | Current        | 40                       | Male   | 56  | IA    |
|          | Adenocarcinoma | Former         | >100                     | Female | 72  | IA    |

**Supplemental Table S3. Patient and tumor characteristics for pre-diagnostic NSCLC cohort.**

| Sampling       | Type             | # of individuals | Male/Female | Age (Min-Max) | Current/Former | histology* | stage  | Time to diagnosis (months)<br>(average (Min-Max)) |
|----------------|------------------|------------------|-------------|---------------|----------------|------------|--------|---------------------------------------------------|
| <b>Pool #1</b> | Case             | 7                | 4/3         | 62 (55-71)    | 6/1            | ADC        | I+II   | 6.8 (1.8-12.4)                                    |
| <b>Pool #2</b> | Case             | 13               | 8/7         | 65 (56-75)    | 8/5            | ADC        | III+IV | 8.8 (6.1-11.4)                                    |
| <b>Pool #3</b> | Case             | 12               | 10/2        | 64 (54-73)    | 8/4            | ADC        | III+IV | 3.5 (1.2-5.8)                                     |
| <b>Pool #4</b> | Case             | 4                | 2/2         | 65 (59-70)    | 3/1            | SCC        | I+II   | 4.6 (1.3-9.5)                                     |
| <b>Pool #5</b> | Case             | 10               | 9/1         | 69 (59-77)    | 5/5            | SCC        | III+IV | 9.6 (7.2-11.3)                                    |
| <b>Pool #6</b> | Case             | 5                | 5/0         | 70 (60-80)    | 3/2            | SCC        | III+IV | 2.3 (1.8-2.6)                                     |
| <b>Pool #1</b> | Healthy controls | 14               | 8/6         | 62 (55-71)    | 12/2           | -          | -      | -                                                 |
| <b>Pool #2</b> | Healthy controls | 26               | 16/14       | 65 (56-75)    | 16/10          | -          | -      | -                                                 |
| <b>Pool #3</b> | Healthy controls | 24               | 20/4        | 64 (54-73)    | 16/8           | -          | -      | -                                                 |
| <b>Pool #4</b> | Healthy controls | 8                | 4/4         | 65 (59-70)    | 6/2            | -          | -      | -                                                 |
| <b>Pool #5</b> | Healthy controls | 20               | 18/2        | 69 (59-77)    | 10/10          | -          | -      | -                                                 |
| <b>Pool #6</b> | Healthy controls | 10               | 10/0        | 70 (60-80)    | 6/4            | -          | -      | -                                                 |

**\*ADC: Adenocarcinoma; SCC: Squamous cell carcinoma**

**Supplemental Table S4: Performance of Ig-bound cryptoproteins in newly diagnosed samples.**

***See excel file.***

**Supplemental Table S5: Performance of Ig-bound cryptoproteins in pre-diagnostic samples.**

***See excel file.***

**Supplemental Table S6: Overlapping Ig-bound cryptoproteins collected at the time of diagnosis or preceding diagnosis of lung cancer. Eight Ig-bound cryptoproteins consistently elevated in both pre-diagnostic and newly-diagnosed cases compared to controls highlighted in red.**

|                         | Newly diagnosed |                |                               | Pre-diagnostic |                |                               |
|-------------------------|-----------------|----------------|-------------------------------|----------------|----------------|-------------------------------|
|                         | All cases       | Adenocarcinoma | Squamous cell carcinoma cases | All cases      | Adenocarcinoma | Squamous cell carcinoma cases |
| Cryptoname*             | Fold Change     | Fold Change    | Fold Change                   | Odds Ratio     | Odds Ratio     | Odds Ratio                    |
| <b>Crypto_KHSRP</b>     | 7.58            | 9.42           | 4.82                          | 1.22           | >10            | 1.11                          |
| <b>Crypto_KIF19</b>     | 5.51            | 7.41           | 2.67                          | >10            | >10            | -                             |
| <b>Crypto_TAF15</b>     | 3.42            | 3.09           | 3.92                          | 0.95           | >10            | 0.05                          |
| <b>Crypto_ZFH3</b>      | 7.47            | -              | 7.47                          | >10            | >10            | -                             |
| <b>Crypto_NEU4</b>      | 1.85            | 2.06           | 1.53                          | 0.94           | -              | 0.94                          |
| <b>Crypto_PCYT2</b>     | 1.43            | 1.87           | 0.77                          | 0.94           | >10            | 0.91                          |
| <b>Crypto_C9orf148</b>  | 1.19            | 1.06           | 1.37                          | 0.80           | >10            | -                             |
| <b>Crypto_TTLL5</b>     | 1.82            | -              | 1.82                          | >10            | >10            | >10                           |
| <b>Crypto_OR52U1P</b>   | 1.13            | 1.13           | -                             | 0.00           | 0.00           | -                             |
| <b>Crypto_LINC01358</b> | 1.08            | 1.08           | -                             | 1.64           | 1.40           | >10                           |
| <b>Crypto_PLVAP</b>     | 1.52            | -              | 1.52                          | 0.99           | 0.99           | -                             |
| <b>Crypto_KHDRBS1</b>   | 1.21            | -              | 1.21                          | >10            | >10            | >10                           |
| <b>Crypto_SLC25A4</b>   | 0.01            | 0.02           | -                             | 1.35           | -              | 1.49                          |

\*Names represent cryptoproteins derived from altORFs, pseudogenes, intronic regions, and other transcripts from listed canonical genes.
